# Supplementary material for: RETRACTED: 6-Pyrazolylpurine as an Artificial Nucleobase for Metal-Mediated Base Pairing in DNA Duplexes
Source: MDPI journal article supplement (doi:10.3390/ijms17040554), 2016-04-14
Supplement: s1 [file s1]

# Supplementary Materials: 6-Pyrazolylpurine as an Artificial Nucleobase for Metal-Mediated Base Pairing in DNA Duplexes

J. Christian Léon, Indranil Sinha and Jens Müller

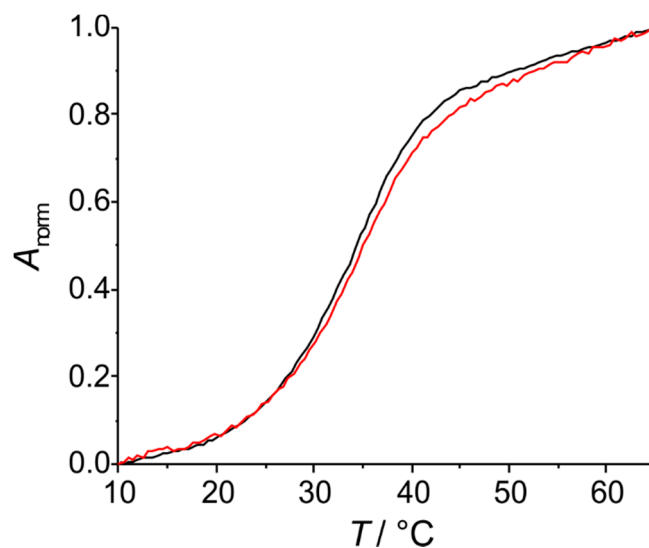

**Figure S1.** UV melting curves of the duplex comprising a central 6PP: 6PP base pair in the absence (black) and presence (red) of one equivalent of  $\text{Cu}(\text{NO}_3)_2$ .

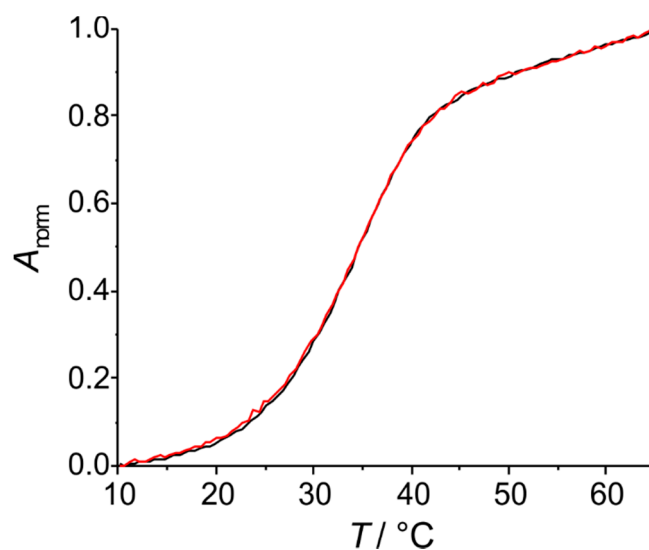

**Figure S2.** UV melting curves of the duplex comprising a central 6PP:6PP base pair in the absence (black) and presence (red) of one equivalent of  $\text{Hg}(\text{NO}_3)_2$ .

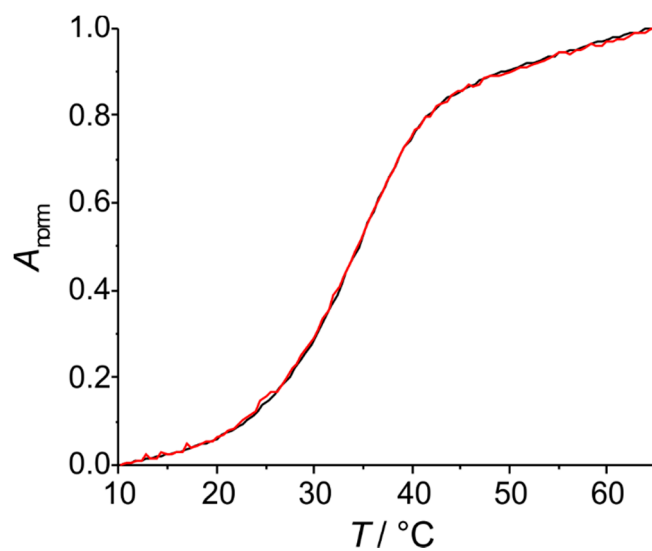

**Figure S3.** UV melting curves of the duplex comprising a central 6PP:6PP base pair in the absence (black) and presence (red) of one equivalent of  $\text{Ni}(\text{NO}_3)_2$ .

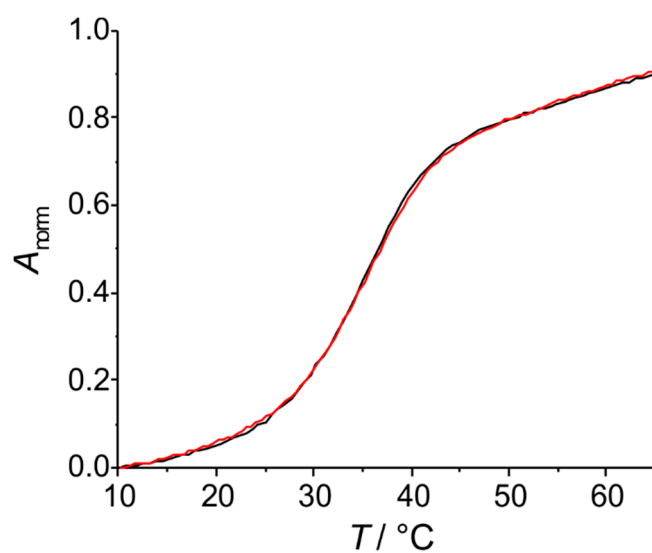

**Figure S4.** UV melting curves of the duplex comprising a central 6PP:6PP base pair in the absence (black) and presence (red) of one equivalent of  $\text{Zn}(\text{NO}_3)_2$ .
